# Supplementary material
Source: PubMed Central journal article supplement (PMC8195859)

## Methods S1. Workflows and detection rates. Related to STAR Methods and Figure 1.

### Experimental workflow

**(A)** Schematic diagram illustrating cell isolation process for single cell RNA-sequencing. Brain regions were dissected according to the Allen CCFv3. Each sample was digested and triturated to obtain single cell suspensions. For SMART-Seq v4 (SSv4) processing, individual cells were sorted into 8-well strip PCR tubes by FACS or by manual picking. Cells were lysed, and SSv4 was used to reverse-transcribe and amplify full-length cDNAs from each cell. cDNAs were then tagged by Nextera XT, PCR-amplified, and processed for Illumina sequencing. For 10x processing, debris was removed from single cell suspension by FACS, suspensions were loaded on the 10x Genomics Chromium™ Controller to create single-cell libraries, and libraries were processed for Illumina sequencing.

**(B)** Ontology of dissected brain regions according to CCFv3. See **Table S1** for each region's full name and sampling.

**(C-D)** The number of cells sampled from each dissection region for SSv4 (**C**) or 10xv2 (**D**). Bars are colored by region.

**(E-F)** Sex sampling proportion per joint region for SSv4 (**E**) or 10xv2 (**F**).

**(G-H)** Genotype sampling proportion per joint region for SSv4 (**G**) or 10xv2 (**H**), colored by region. Columns add up to 100%.



## Data workflow

(A-B) scRNA-seq pipeline and data preprocessing workflow outlining the path from individual experimental animals to quality control (QC)-qualified scRNA-seq data for SSv4 (A) or 10xv2 (B). At multiple points throughout sample processing, cell and sample metadata are recorded in a laboratory information management system (LIMS, labeled as L), which informs QC processes. Samples must pass QC benchmarks to continue through sample processing.

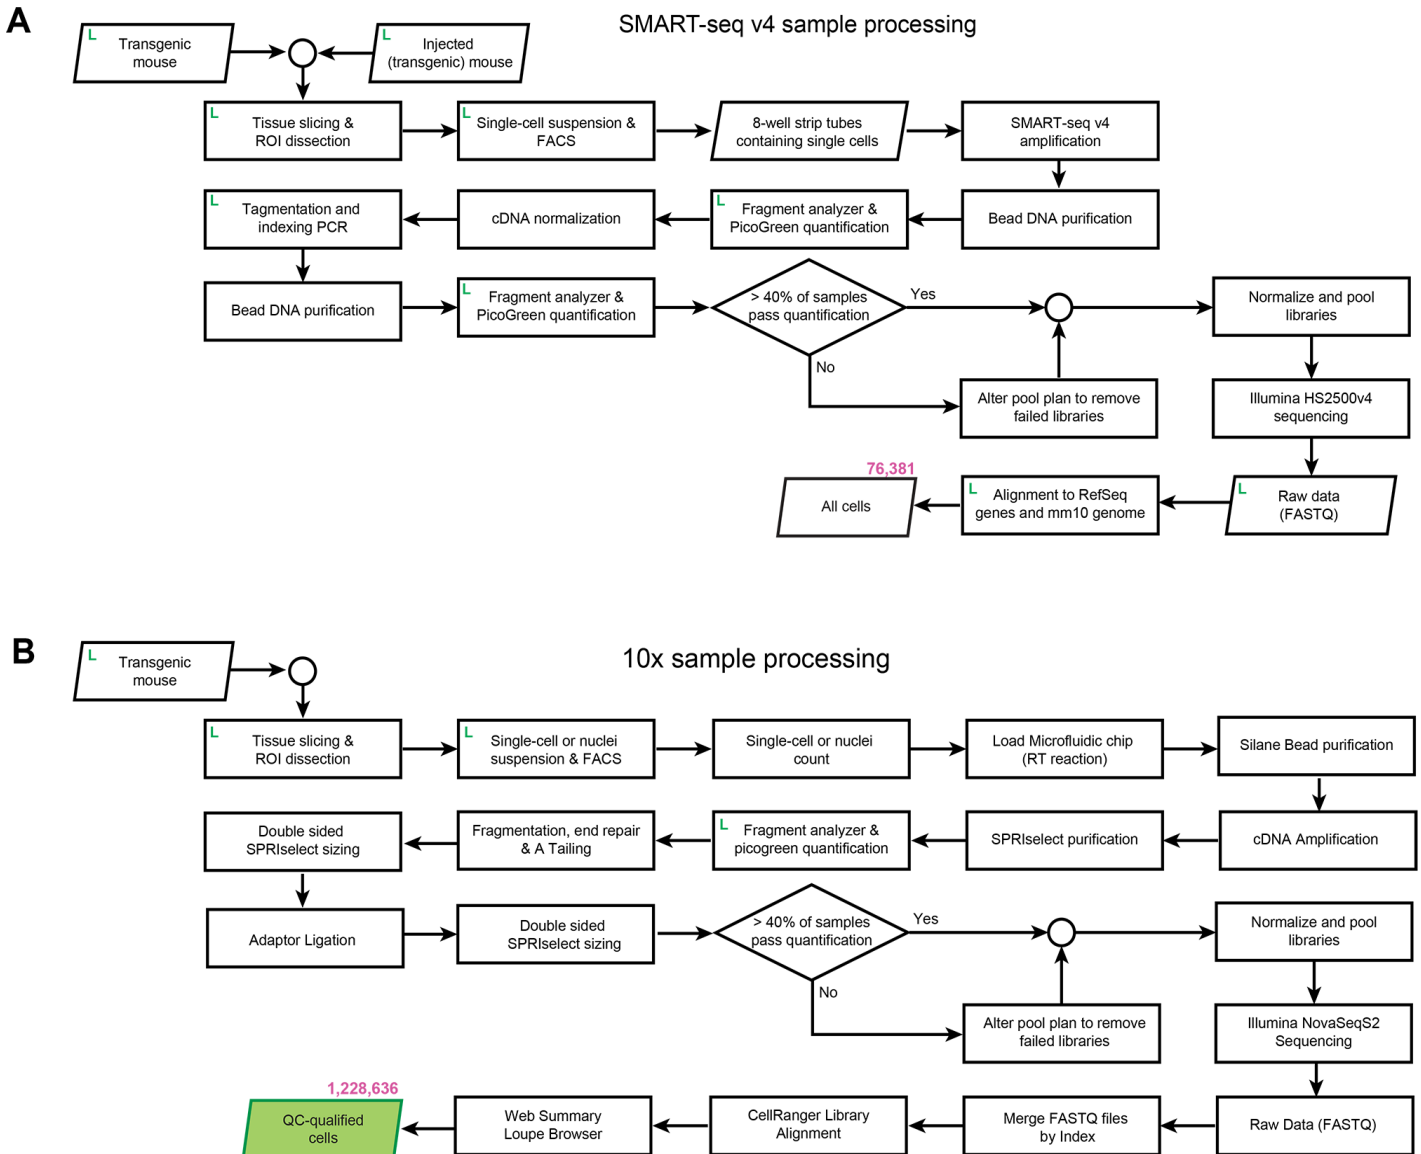

## Analysis workflow

(A) The number of cells at each step in the scRNA-seq data analysis pipeline. The identification of doublets and low-quality clusters is described in more detail in **Methods**. The 10xv2 and SSv4 data was first QC-ed and analyzed separately. After initial clustering the datasets were combined and QC-ed again before and after joint clustering.

(B) Joint clustering procedure using the new `i_harmonize` function from the `scrattch.hicat` package. For this study, as the 10xv2 dataset includes more cells while the SSv4 dataset provides more sensitive gene detection, both datasets were used as reference datasets. For each reference dataset anchor cells were selected to achieve uniform coverage of all cell types. Based on these anchor cells high variance genes were selected (select high variance gene module, yellow box), and high variance genes from each reference dataset were pooled. Next, a common adjacency graph using all cells from all datasets was built (purple box) and the standard Jaccard-Louvain clustering algorithm was applied (clustering module, blue box). Resulting clusters were merged to ensure that all pairs of clusters, even at the finest level, were separable by conserved differentially expressed genes across platforms. This `i_harmonize` function applies the integrative clustering across datasets iteratively, while ensuring that all clusters at each iteration are separable by conserved differentially expressed genes.

(C) To assess correspondence of cell types identified in this study to previously published datasets, cells from published datasets were mapped to our clusters using the nearest centroid classifier based on a set of shared markers that were detected in both datasets (expression > 0). To estimate the robustness of mapping, classification was repeated 100 times, each time using 80% of randomly sampled markers, and the probability for each cell to map to every reference cluster was computed.

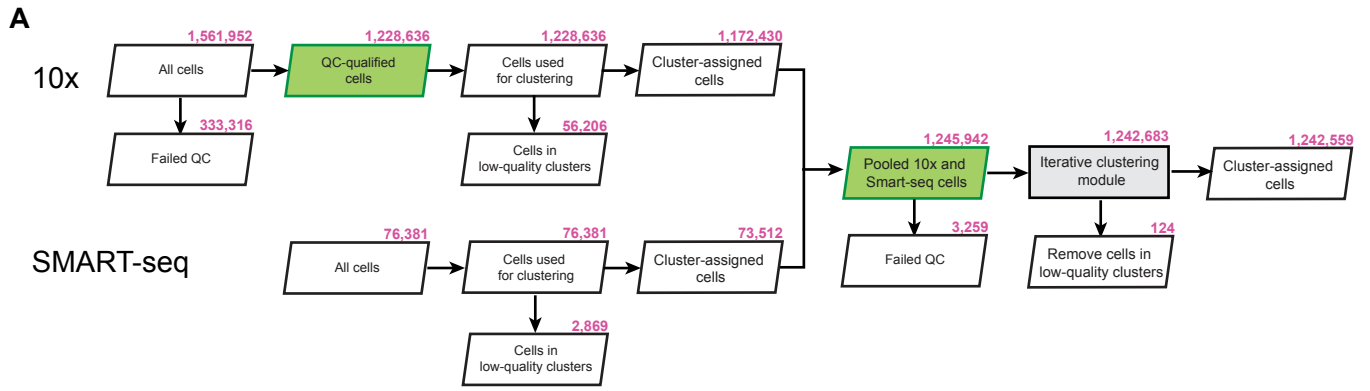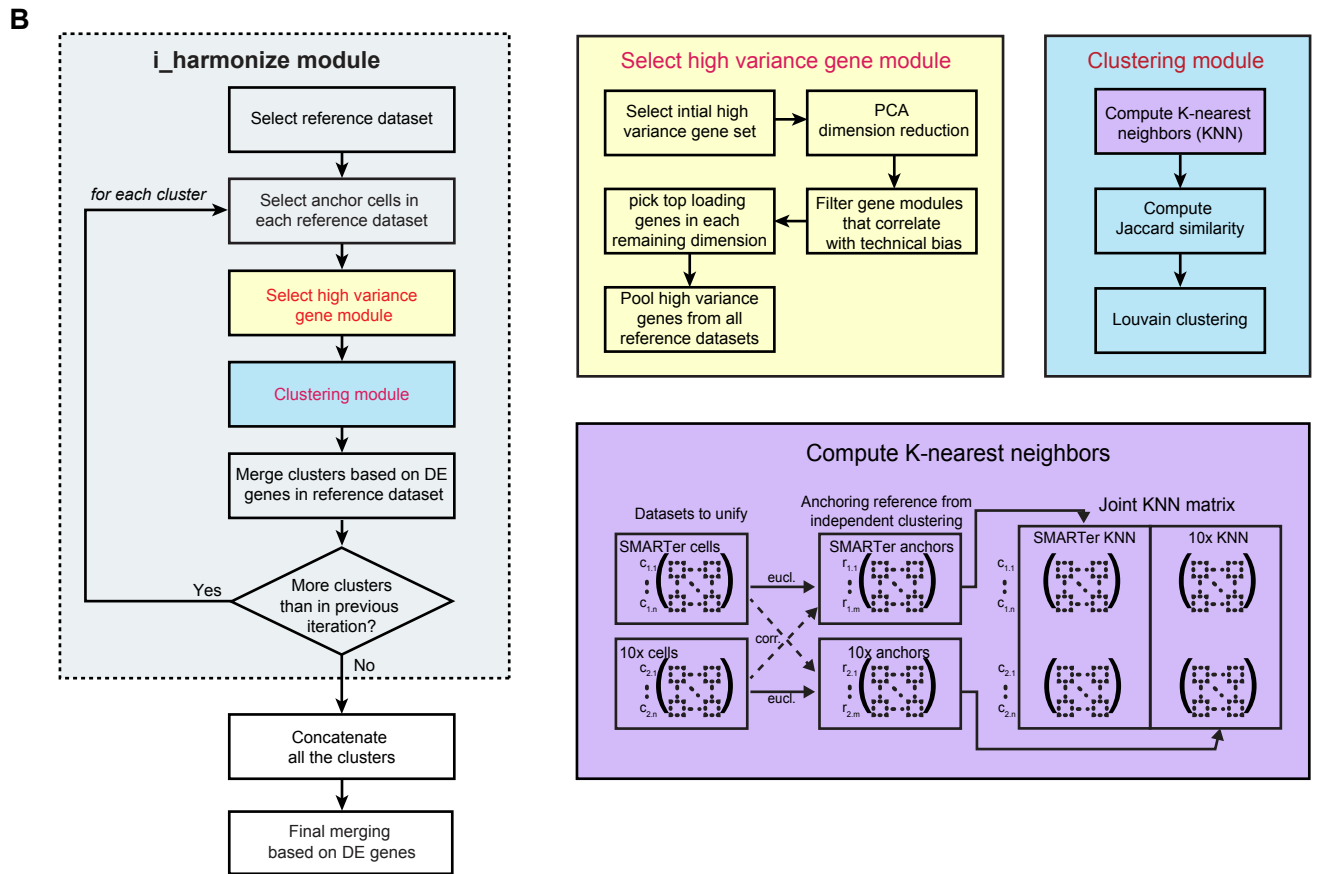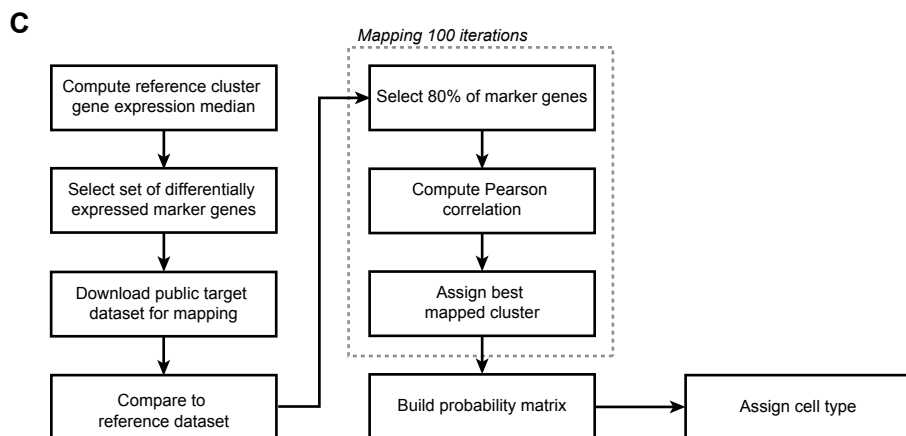

## Detection rates

**(A-B)** Number of genes detected per SSv4 **(A)** or 10xv2 **(B)** cell for each cluster.

**(C)** Number of UMI's detected per 10xv2 cell for each cluster. The average number of UMIs detected per cell in 10xv2 data was 10,576. The numbers of genes or UMIs detected were largely consistent within each class and subclass of cells; non-neuronal cells and the CR and Meis2 neurons had substantially lower numbers of genes detected than other neurons.

**(D)** Comparison of the relative expression level of marker genes across all clusters between the SSv4 and 10xv2 datasets. Since the two datasets differ in experimental platform, gene expression quantification software and gene annotation reference, for each gene, we normalized the average  $\log_2(\text{CPM}+1)$  values at the cluster level in the range [0,1] by subtracting the minimum value and then dividing them by the maximum value for that gene. The smooth scatter plot represents normalized gene expression for all marker genes across all clusters in the two datasets. The areas with the highest density of data points are colored blue, and the lowest density white. Two example genes are shown, each dot representing the average expression level for each gene in each cluster.

**(E)** Distribution of gene expression conservation between the two platforms. For each of 5,981 marker genes, we computed the correlation of its average expression across all overlapping cell types between 10xv2 and SSv4, and distribution of such correlation values ('cor') is shown in the density plot. Two example genes shown in panel **D** are highlighted: *Necab1* represents a gene with high correspondence between the two datasets, while *Crispld2* is detectable in SSv4 cells but not in 10xv2 cells.

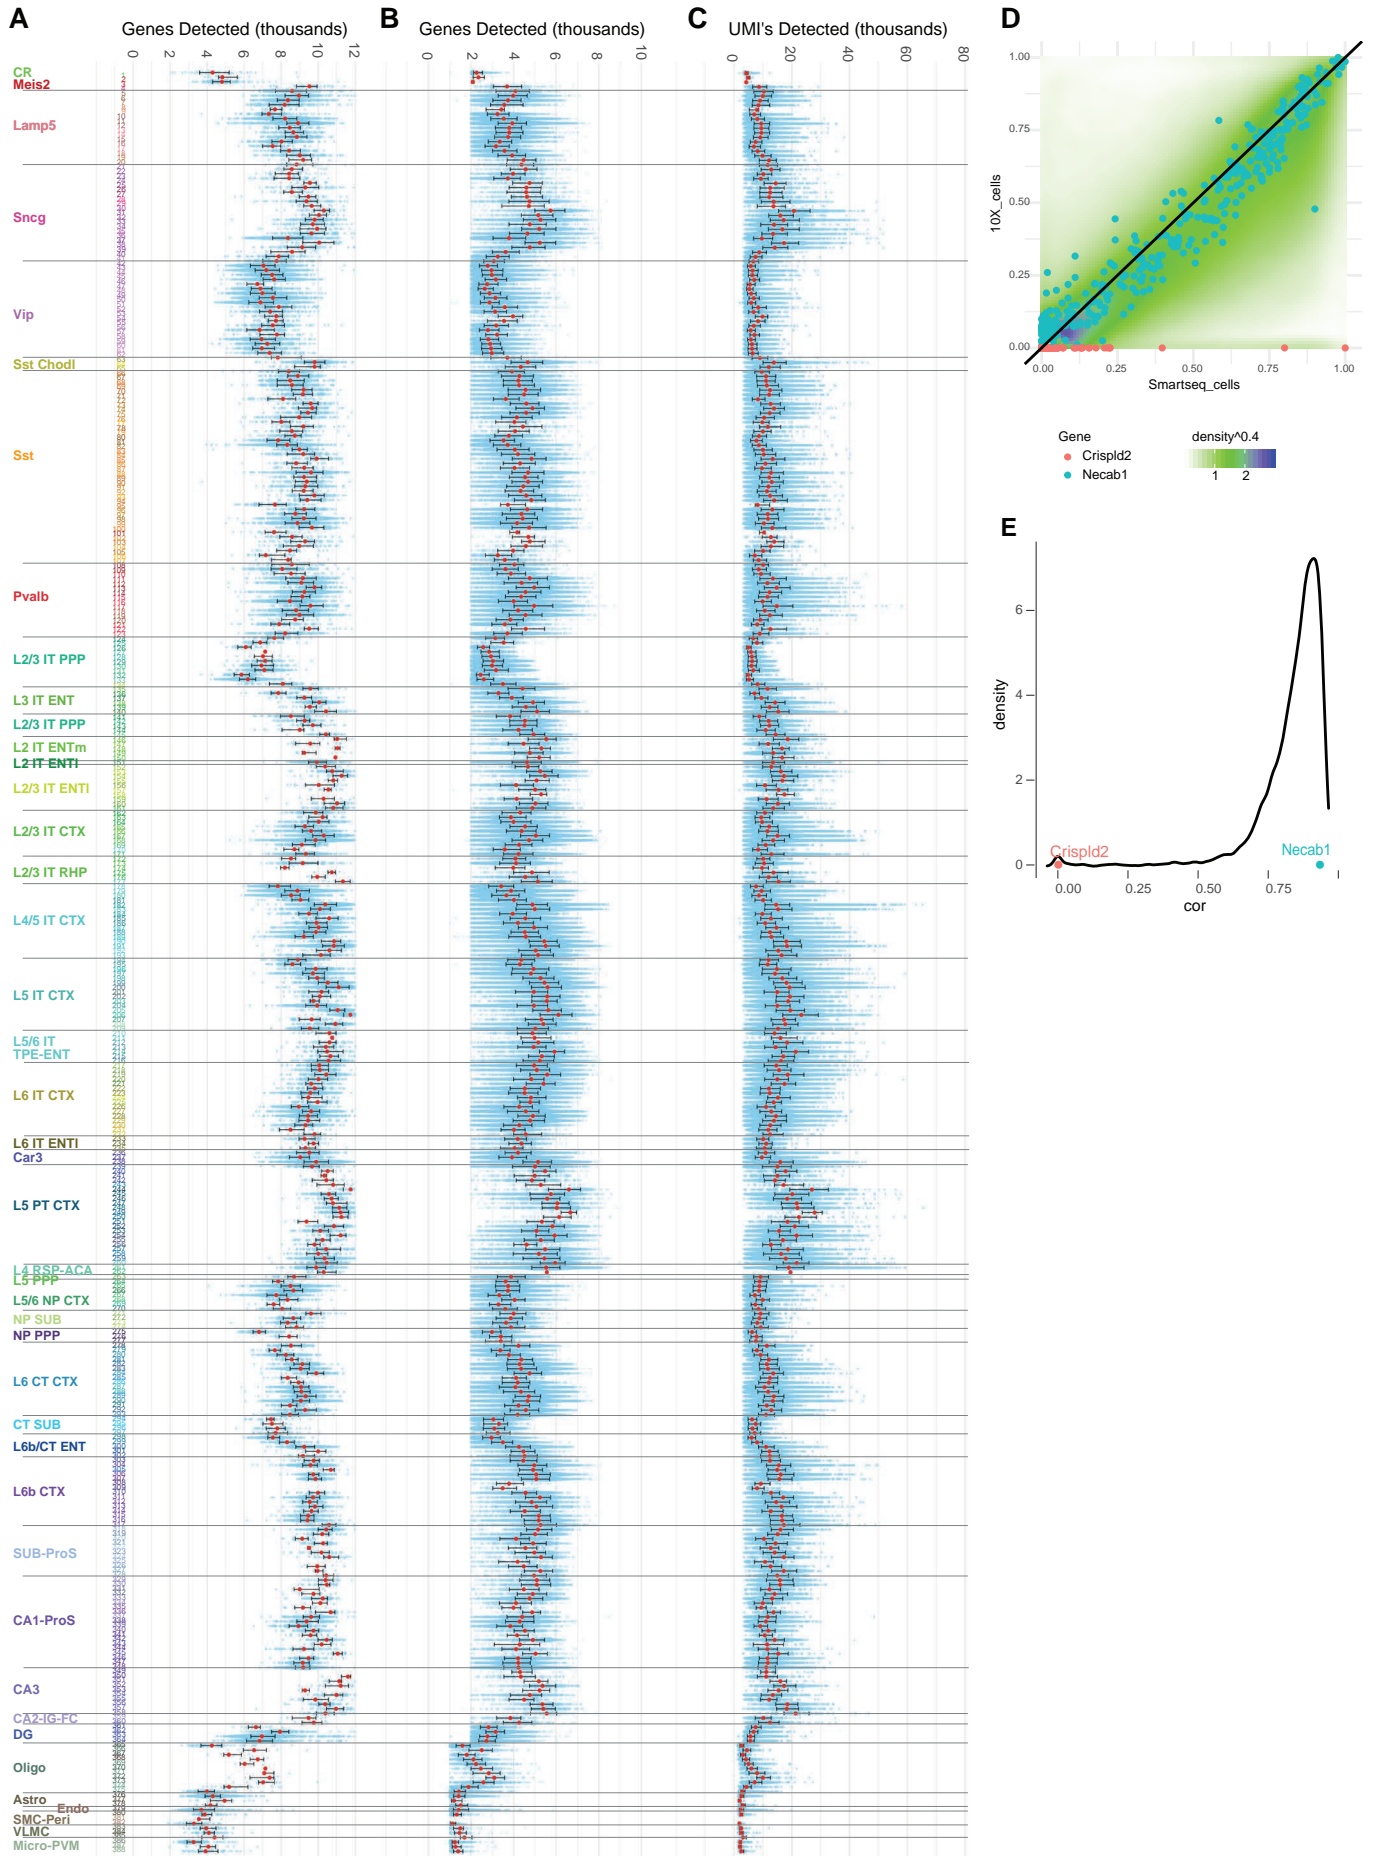

Supplement: NIHMS1695378-supplement-2.pdf [file NIHMS1695378-supplement-2.pdf]
