# Supplementary material
Source: PubMed Central journal article supplement (PMC8195859)
Supplement: NIHMS1695378-supplement-11.pdf [file NIHMS1695378-supplement-11.pdf]

**Table S1. Cell sampling per region, Related to Figure 1.**

Number of cells sampled for SMART-Seq and 10x platforms, with full names and abbreviations for each region.

| <b>Region Abbreviation</b>   | <b>Structure</b>            | <b>Sub-structure abbreviation</b> | <b>10x Cells</b> | <b>SMART-Seq Cells</b> | <b>Region Name</b>                                                                                       |
|------------------------------|-----------------------------|-----------------------------------|------------------|------------------------|----------------------------------------------------------------------------------------------------------|
| <b>ACA</b>                   | CTX (isocortex)             | CTX                               | 58988            | 5099                   | Anterior cingulate area                                                                                  |
| <b>AI</b>                    | CTX (isocortex)             | CTX                               | 52428            | 1528                   | Agranular insular area                                                                                   |
| <b>ALM</b>                   | CTX (isocortex)             | CTX                               | NA               | 9667                   | Anterolateral motor cortex (part of MOs)                                                                 |
| <b>AUD</b>                   | CTX (isocortex)             | CTX                               | 71705            | 1489                   | Auditory areas                                                                                           |
| <b>ENT</b>                   | HPF (hippocampal formation) | ENT                               | 62308            | NA                     | Entorhinal area                                                                                          |
| <b>ENTI</b>                  | HPF (hippocampal formation) | ENT                               | NA               | 1594                   | Entorhinal area (lateral part)                                                                           |
| <b>ENTm</b>                  | HPF (hippocampal formation) | ENT                               | NA               | 1564                   | Entorhinal area (medial part)                                                                            |
| <b>GU-VISC-Alp</b>           | CTX (isocortex)             | CTX                               | NA               | 1482                   | Gustatory areas, visceral area, agranular insular area (posterior part)                                  |
| <b>HIP</b>                   | HPF (hippocampal formation) | HIP                               | 82535            | 6564                   | Hippocampal region                                                                                       |
| <b>MOp</b>                   | CTX (isocortex)             | CTX                               | 123727           | 6588                   | Primary motor area                                                                                       |
| <b>MOs-FRP</b>               | CTX (isocortex)             | CTX                               | 34331            | NA                     | Secondary motor area, frontal pole                                                                       |
| <b>ORB</b>                   | CTX (isocortex)             | CTX                               | NA               | 1453                   | Orbital area                                                                                             |
| <b>PAR-POST-PRE</b>          | HPF (hippocampal formation) | PPP (PAR-POST-PRE)                | NA               | 1584                   | Parasubiculum, postsubiculum, presubiculum                                                               |
| <b>PAR-POST-PRE-SUB-ProS</b> | HPF (hippocampal formation) | PPP-SP (PAR-POST-PRE-SUB-ProS)    | 51473            | NA                     | Parasubiculum, postsubiculum, presubiculum, subiculum, prosubiculum                                      |
| <b>PL-ILA</b>                | CTX (isocortex)             | CTX                               | NA               | 1472                   | Prelimbic area, Infralimbic area                                                                         |
| <b>PL-ILA-ORB</b>            | CTX (isocortex)             | CTX                               | 71017            | NA                     | Prelimbic area, Infralimbic area, orbital area                                                           |
| <b>PTLp</b>                  | CTX (isocortex)             | CTX                               | 27333            | 1540                   | Posterior parietal association areas                                                                     |
| <b>RSP</b>                   | CTX (isocortex)             | CTX                               | 65710            | 1757                   | Retrosplenial area                                                                                       |
| <b>RSPv</b>                  | CTX (isocortex)             | CTX                               | NA               | 298                    | Retrosplenial area (ventral part) (retro-seq only)                                                       |
| <b>SSp</b>                   | CTX (isocortex)             | CTX                               | 81050            | 5665                   | Primary somatosensory area                                                                               |
| <b>SSs</b>                   | CTX (isocortex)             | CTX                               | NA               | 1866                   | Supplemental somatosensory area                                                                          |
| <b>SSs-GU-VISC-Alp</b>       | CTX (isocortex)             | CTX                               | 47094            | NA                     | Supplemental somatosensory area, gustatory areas, visceral area, agranular insular area (posterior part) |
| <b>SUB-ProS</b>              | HPF (hippocampal formation) | SUB                               | NA               | 1609                   | Subiculum, prosubiculum                                                                                  |
| <b>TEa-PERIECT</b>           | CTX (isocortex)             | TPE (TEa-PERIECT)                 | 59747            | 1585                   | Temporal association areas, perirhinal area, entorhinal area                                             |
| <b>VIS</b>                   | CTX (isocortex)             | CTX                               | 214496           | NA                     | Visual areas                                                                                             |
| <b>VISpl-VISpor</b>          | CTX (isocortex)             | CTX                               | NA               | 1120                   | Posterolateral visual area, postrhinal area                                                              |
| <b>VISl-VISal-VISli</b>      | CTX (isocortex)             | CTX                               | NA               | 1133                   | Lateral visual area, anterolateral visual area, laterointermediate area                                  |
| <b>VISam-VISpm</b>           | CTX (isocortex)             | CTX                               | NA               | 1133                   | Anteromedial visual area, posteromedial visual area                                                      |
| <b>VISl</b>                  | CTX (isocortex)             | CTX                               | 18814            | NA                     | Lateral visual areas                                                                                     |
| <b>VISm</b>                  | CTX (isocortex)             | CTX                               | 18200            | NA                     | Medial visual areas                                                                                      |
| <b>VISp</b>                  | CTX (isocortex)             | CTX                               | 29763            | 15572                  | Primary visual area                                                                                      |
