# Supplementary material
Source: PubMed Central journal article supplement (PMC8195859)

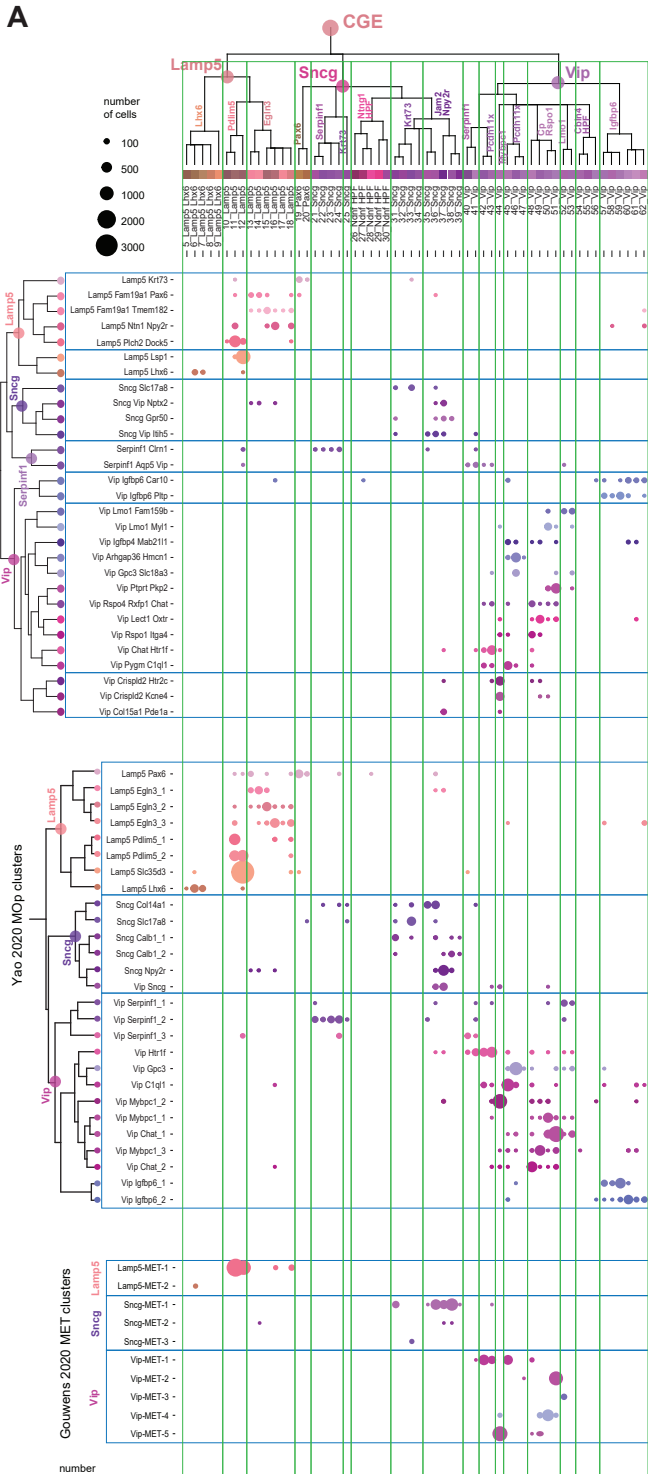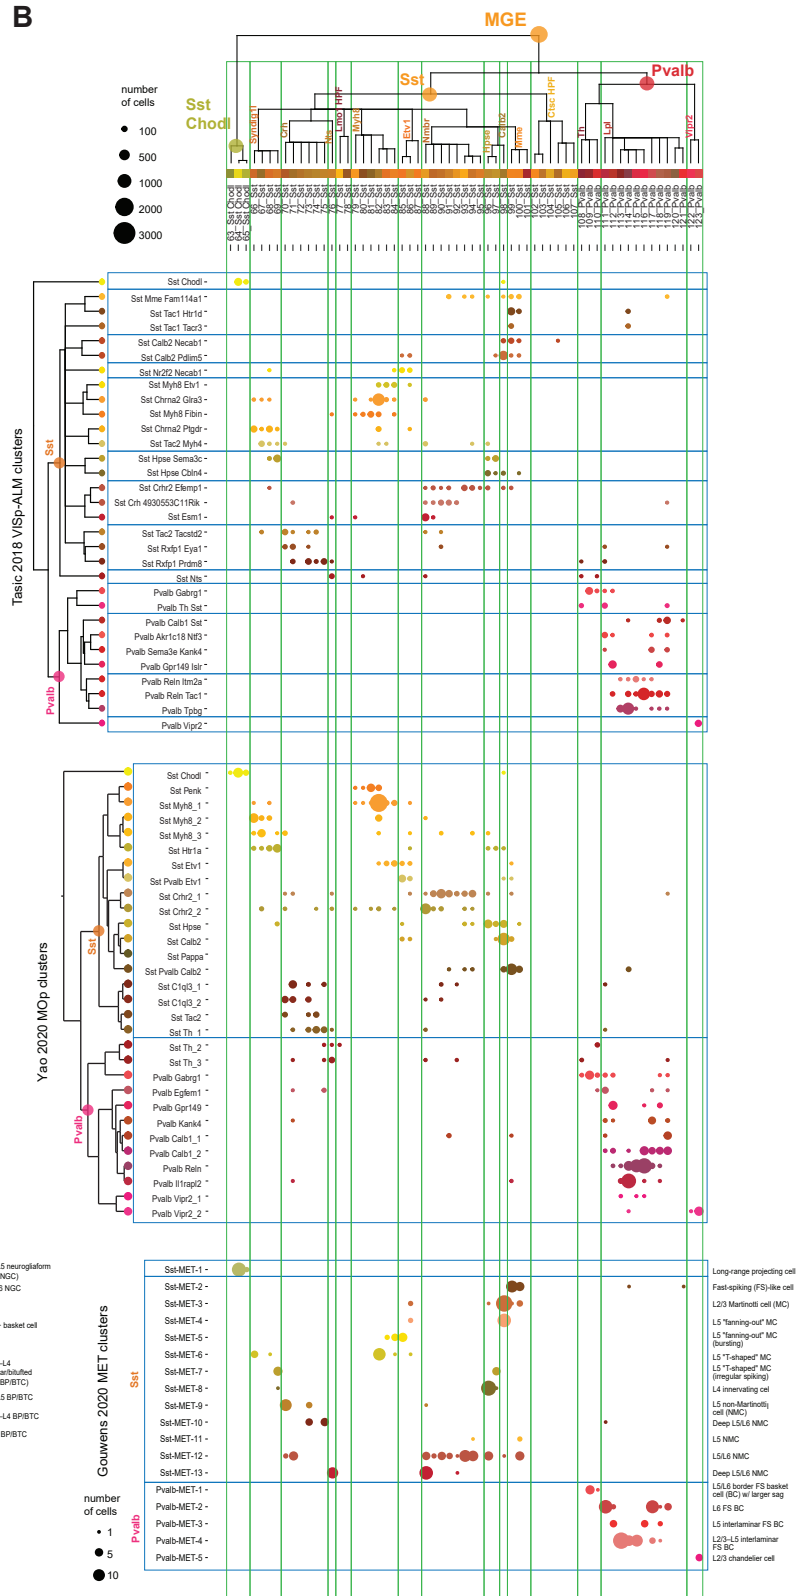

Supplement: NIHMS1695378-supplement-3.pdf [file NIHMS1695378-supplement-3.pdf]

HPF Ex clusters

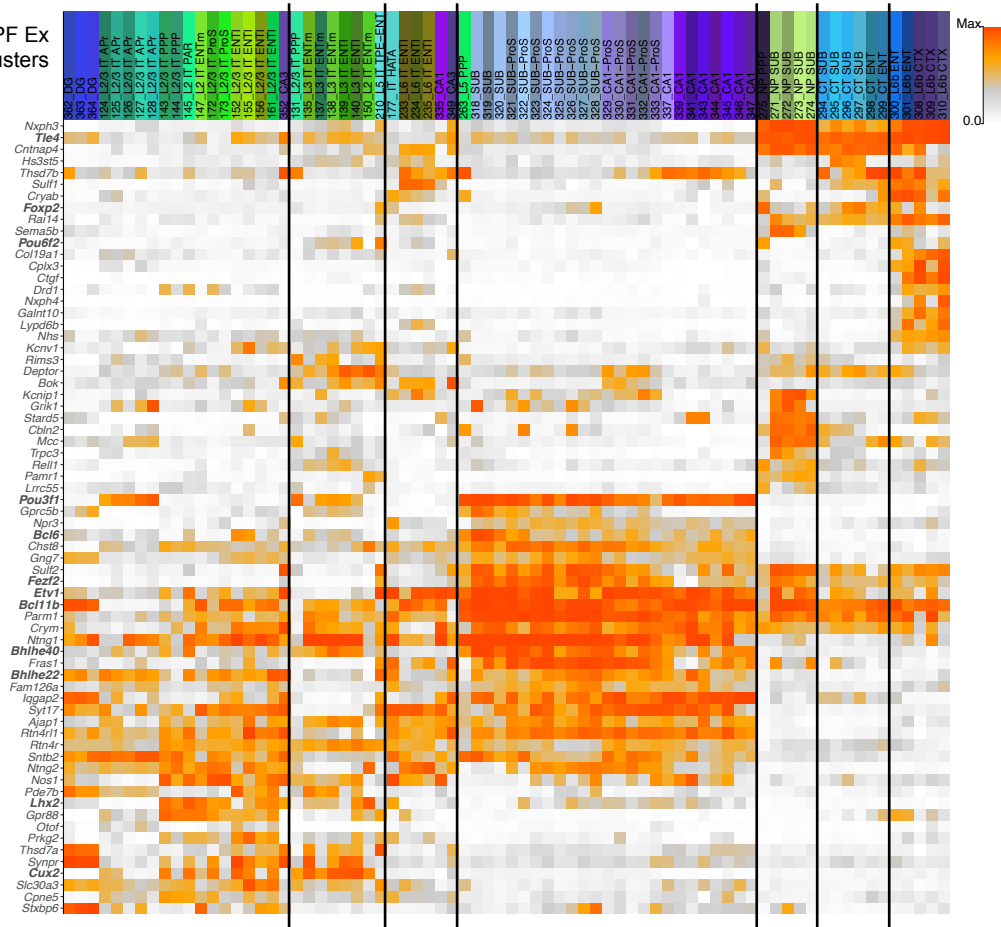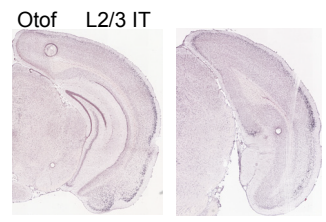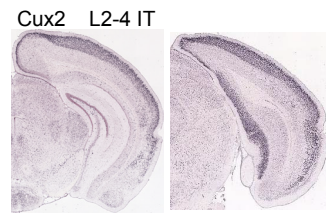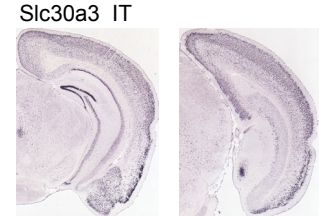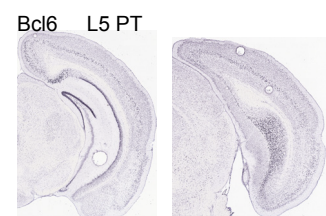

CTX Ex clusters

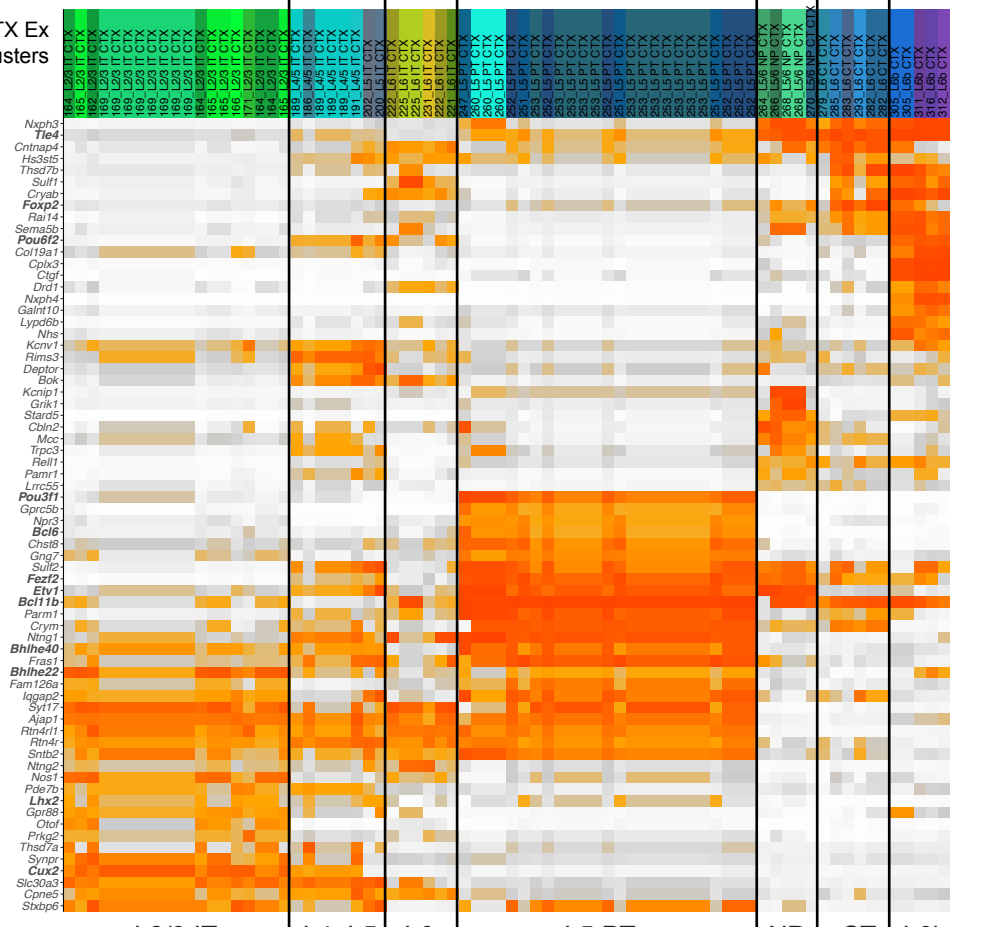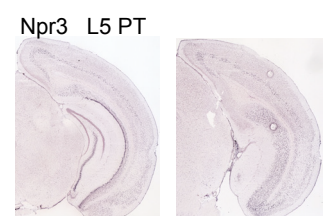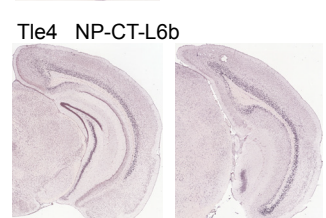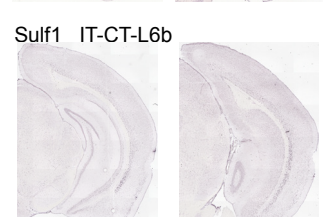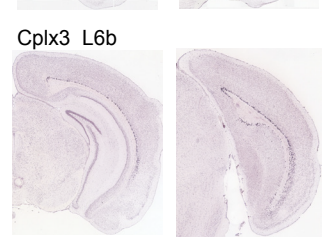

Supplement: NIHMS1695378-supplement-5.pdf [file NIHMS1695378-supplement-5.pdf]

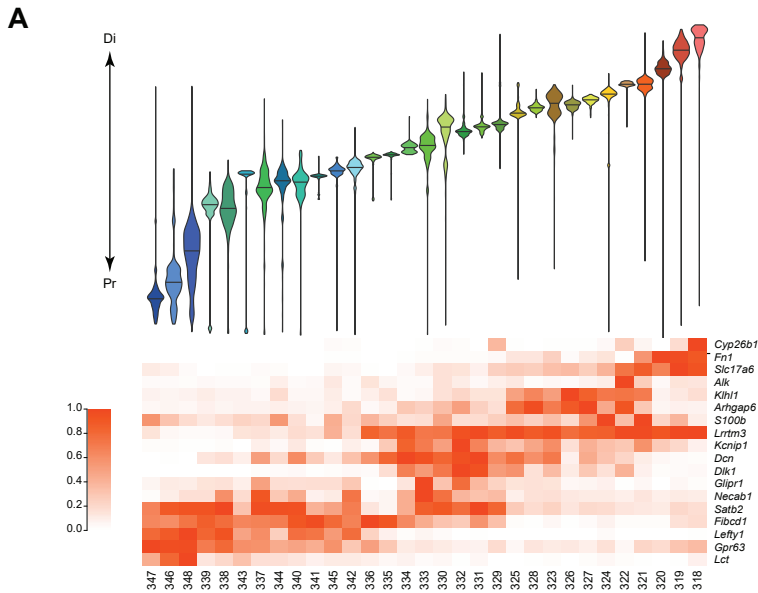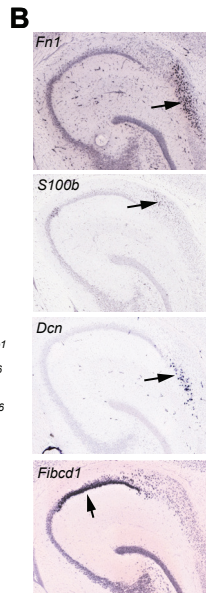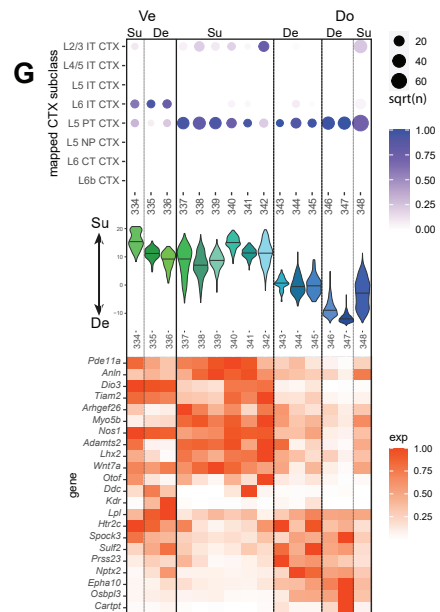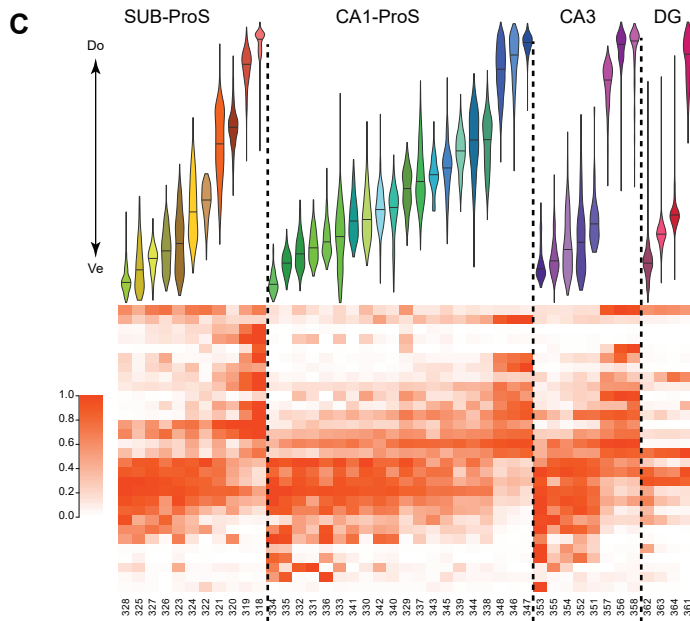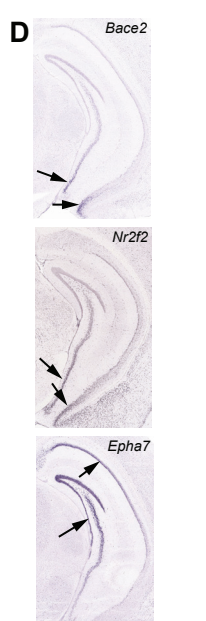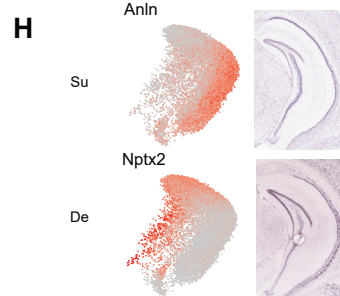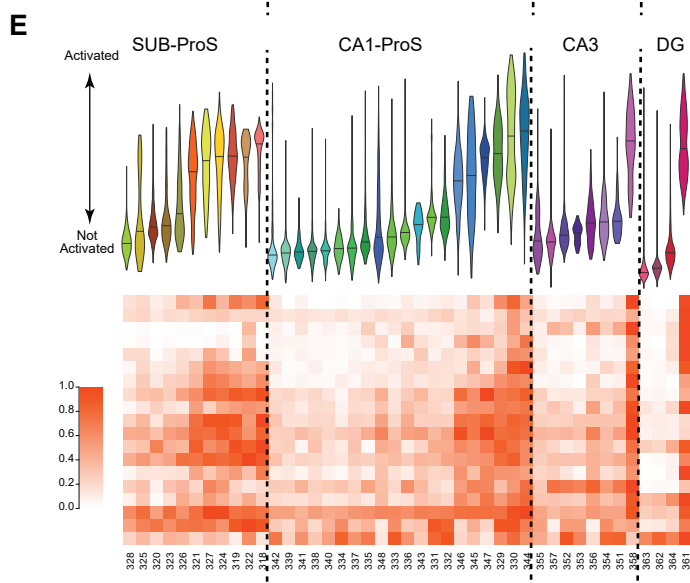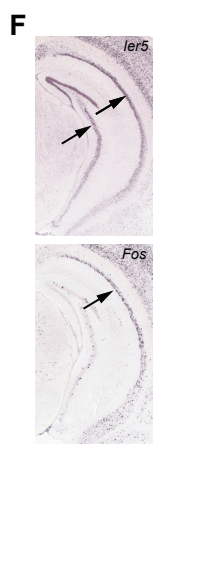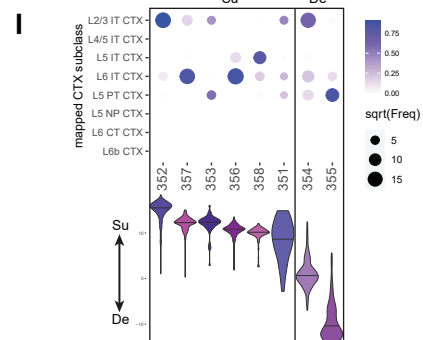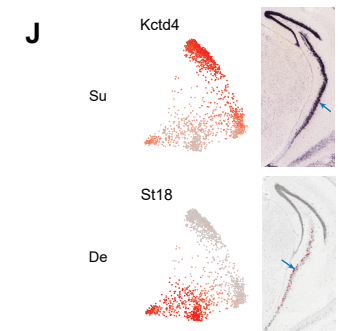

Supplement: NIHMS1695378-supplement-7.pdf [file NIHMS1695378-supplement-7.pdf]

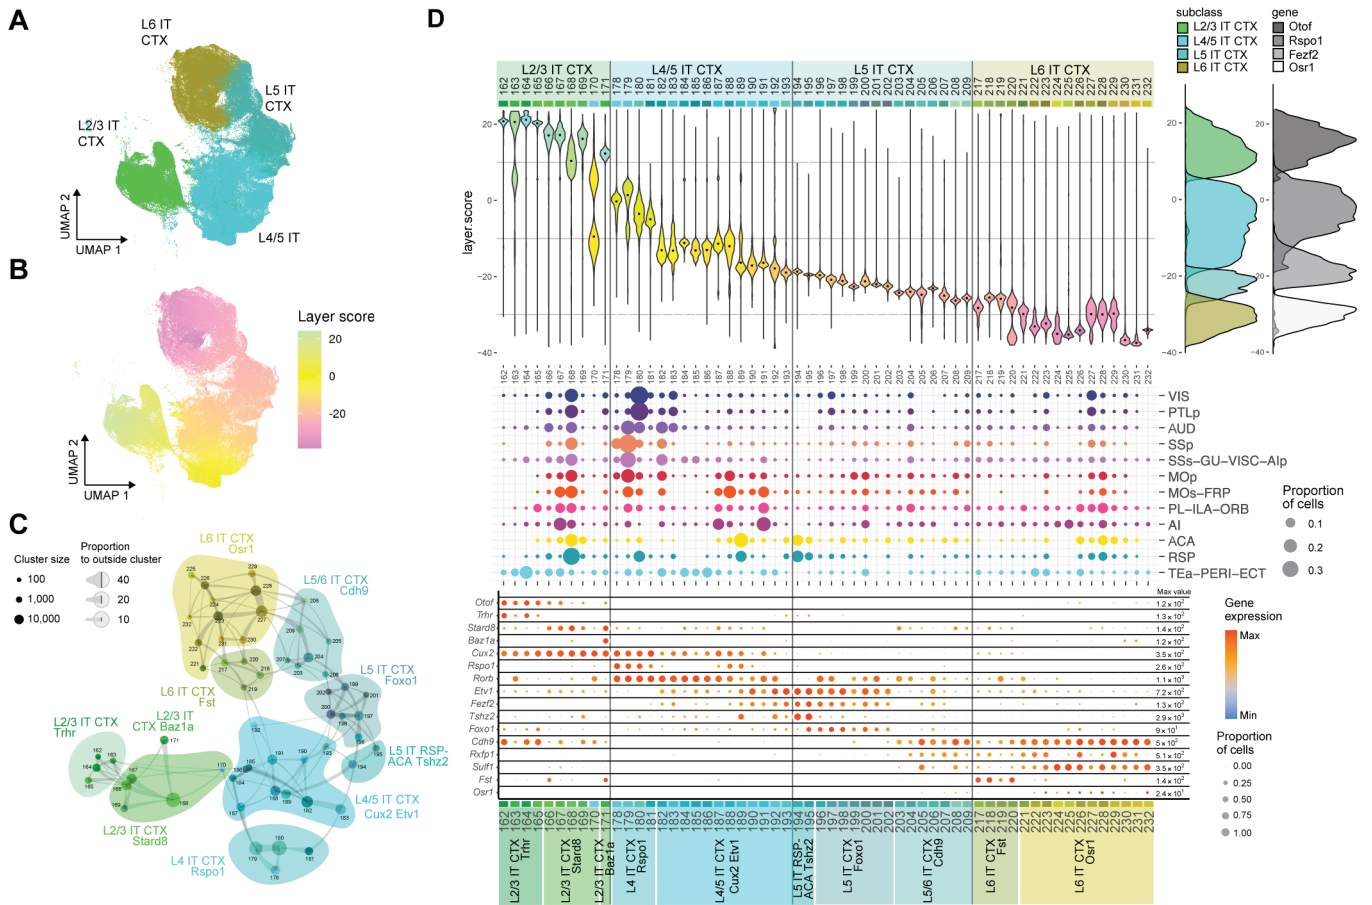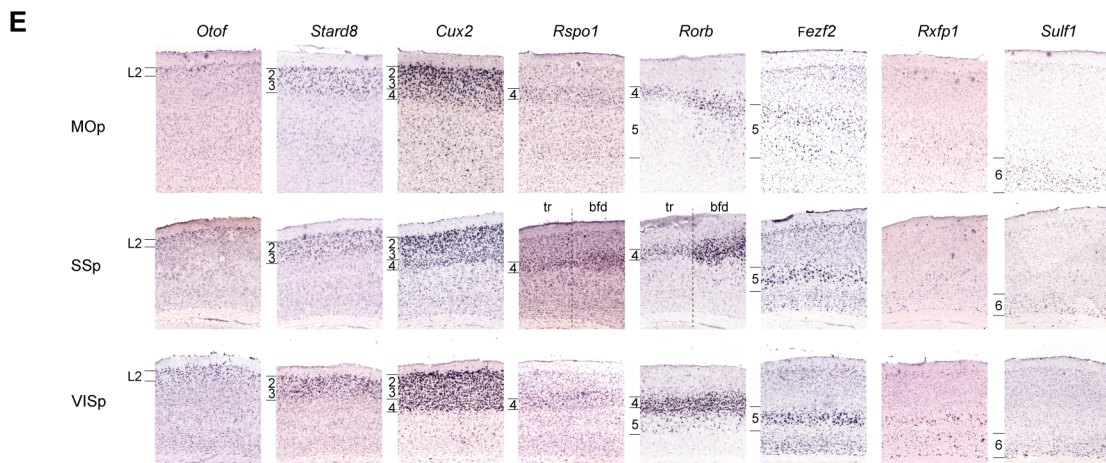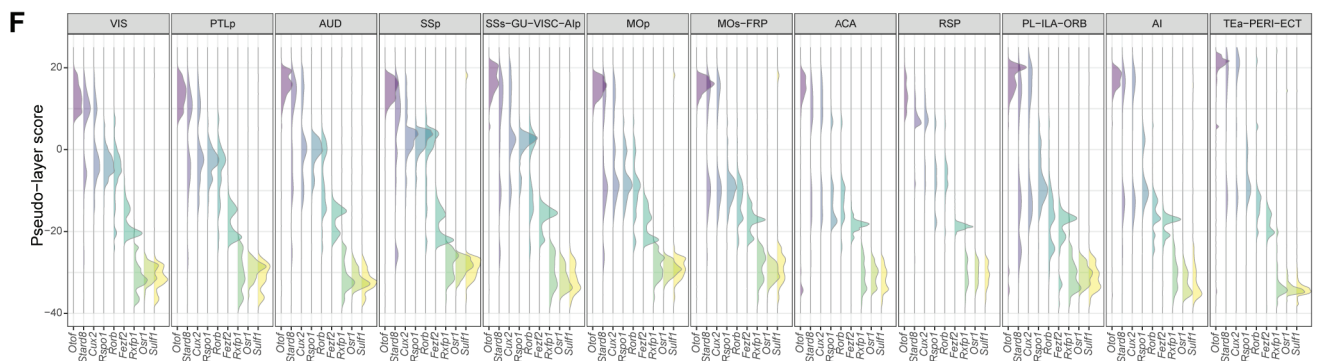

Supplement: NIHMS1695378-supplement-8.pdf [file NIHMS1695378-supplement-8.pdf]

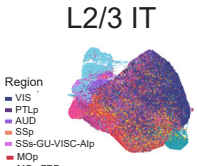

- Region
- VIS
  - PTLp
  - AUD
  - SSP
  - SSs-GU-VISC-Alp
  - MOp
  - MOs-FRP
  - PL-LA-ORB
  - AJ
  - ACA
  - RSP
  - TEs-PERl-ECT
  - ENT
  - PPP-SP
  - HIP

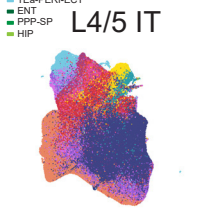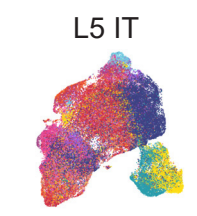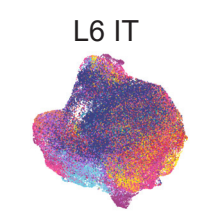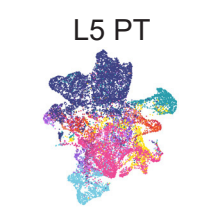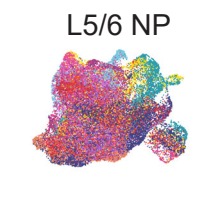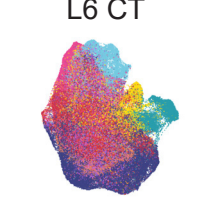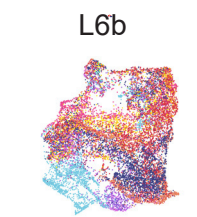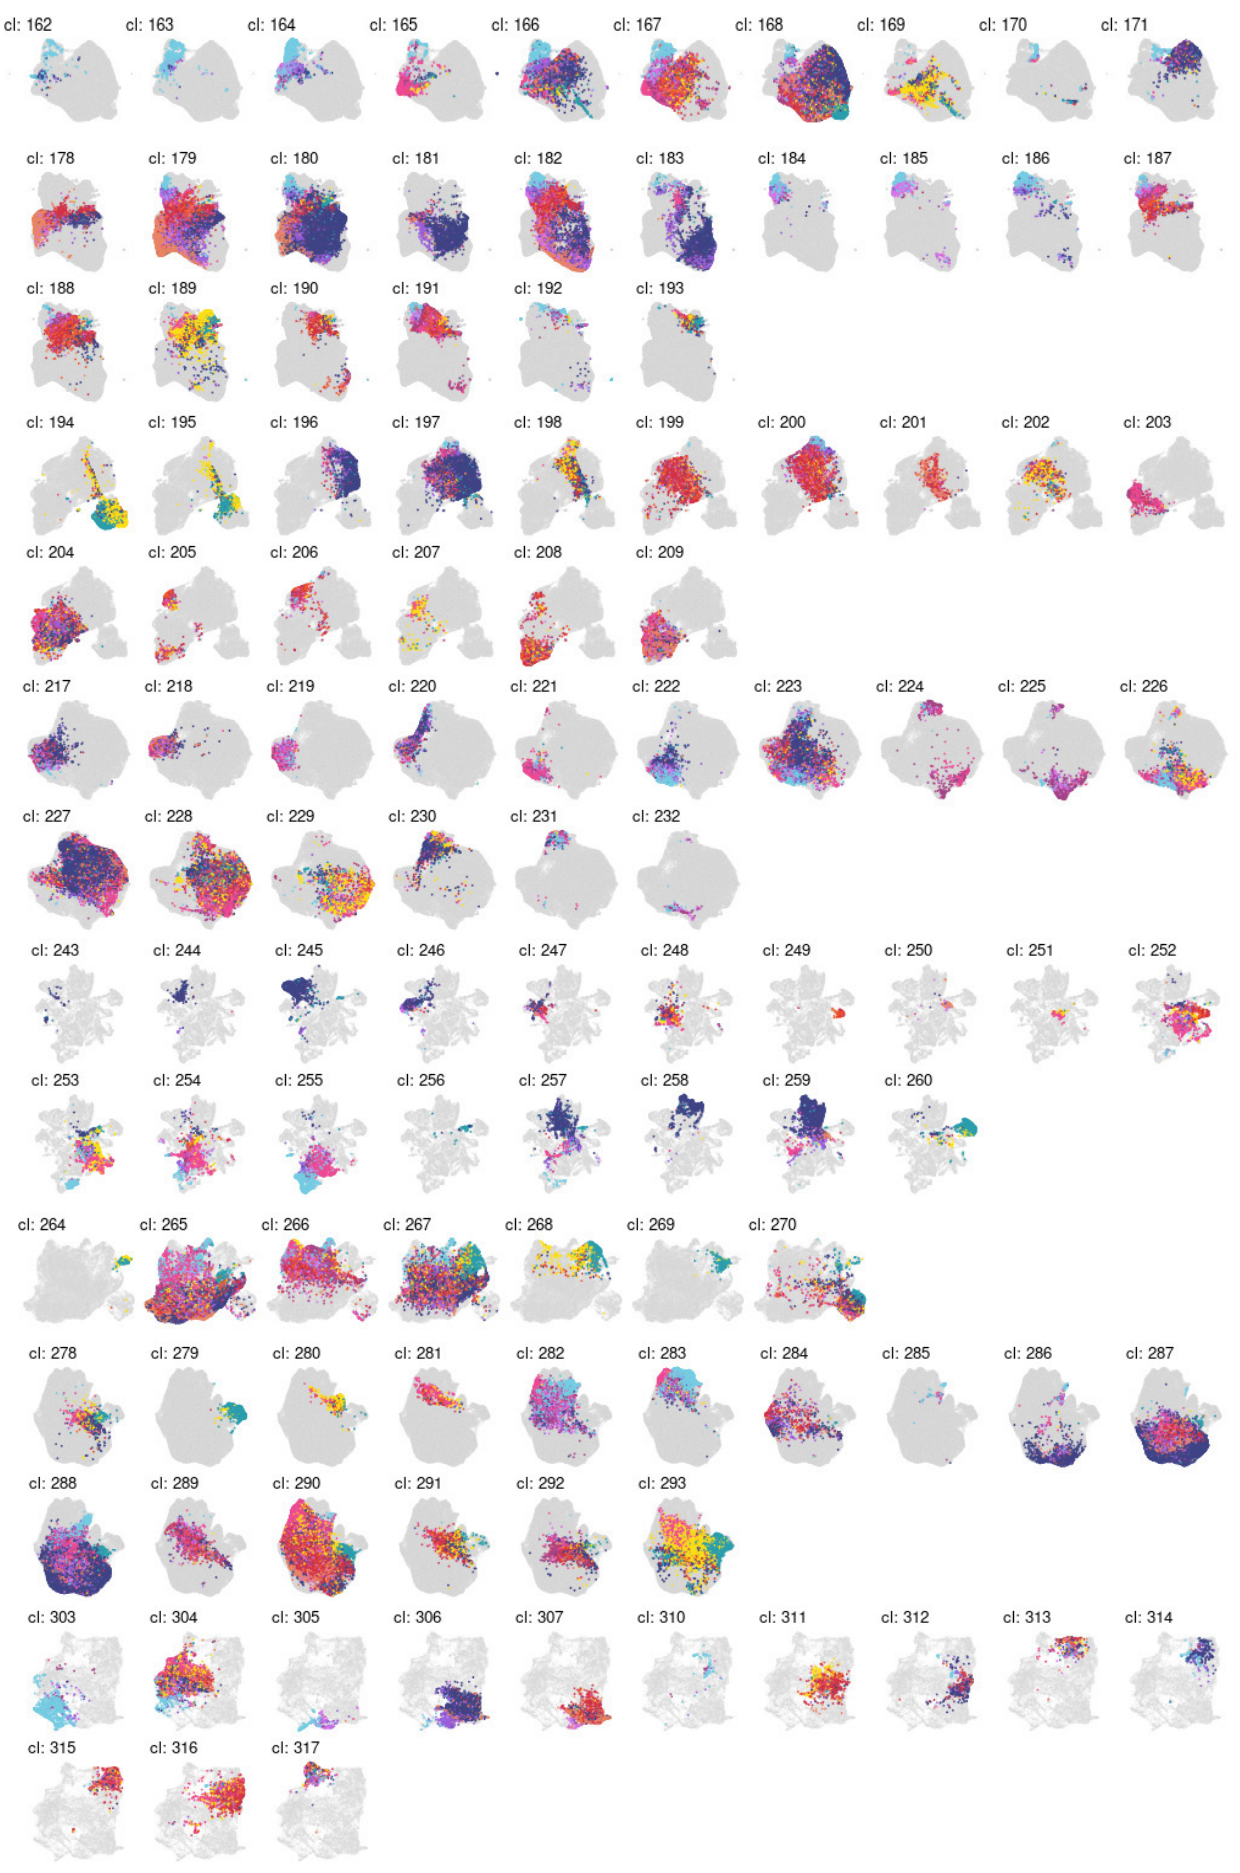

Supplement: NIHMS1695378-supplement-9.pdf [file NIHMS1695378-supplement-9.pdf]
